# Supplementary material
Source: ML conference proceedings conference paper supplement (https://proceedings.neurips.cc/paper_files/paper/2018/hash/062ddb6c727310e76b6200b7c71f63b5-Abstract.html)
Supplement: Supplementary file [file 062ddb6c727310e76b6200b7c71f63b5-Supplemental.zip]

# Supplementary Material for: One-Shot Unsupervised Cross Domain Translation

## A More samples

The following figures show examples of the translation achieved by our method and the various baselines for images from the datasets we used in the experiments.

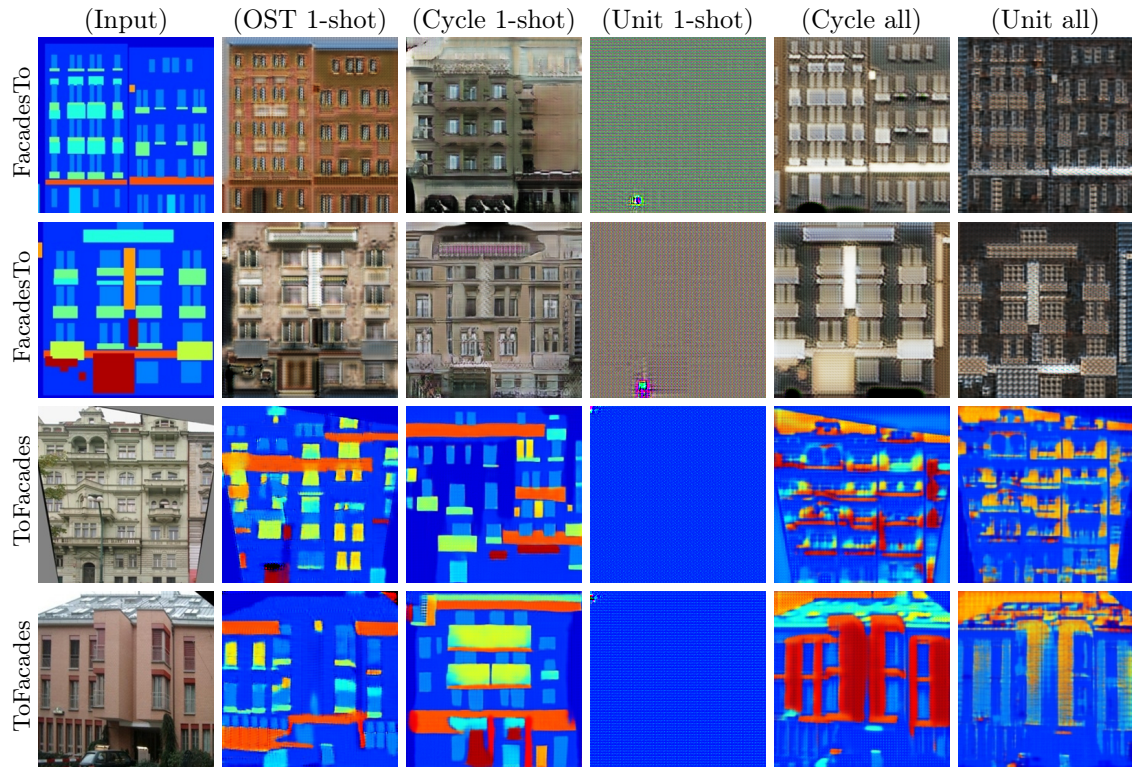

Figure 1: Additional mappings as given in Fig.3 of the paper for the task of Facades to Images and Images to Facades.

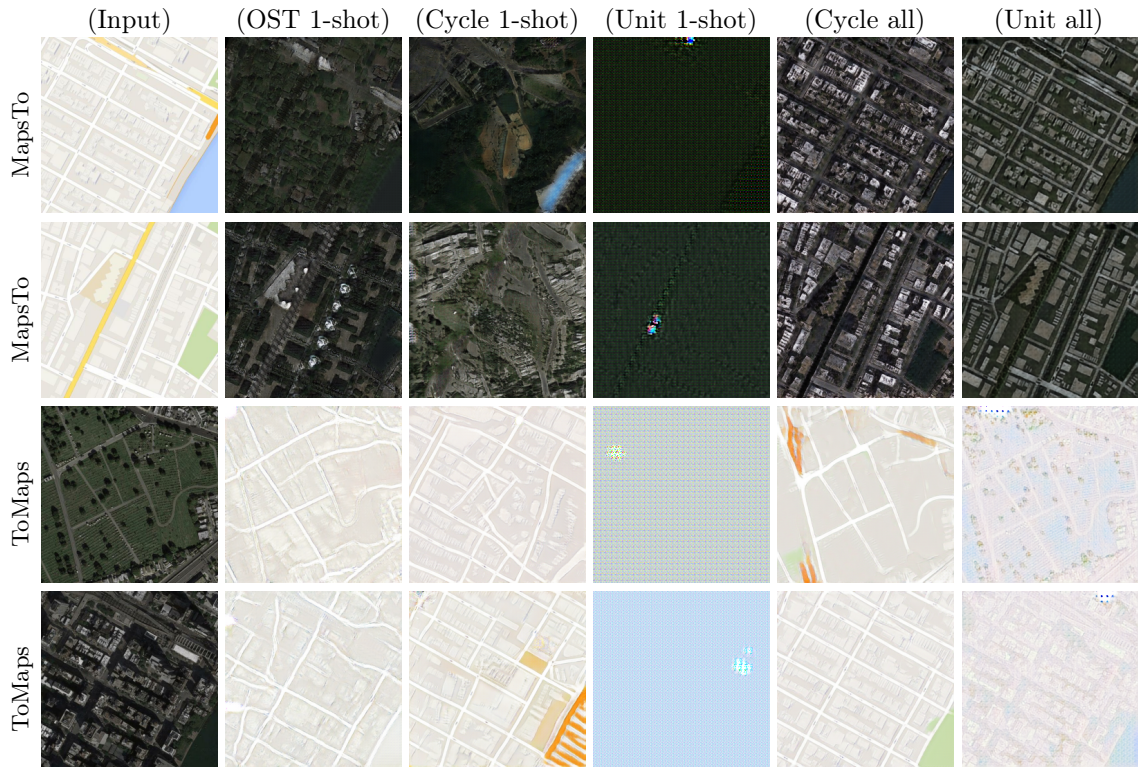

Figure 2: Additional mappings as given in Fig.3 of the paper for the task of Maps to Aerial View Images and Aerial View Images to Maps.



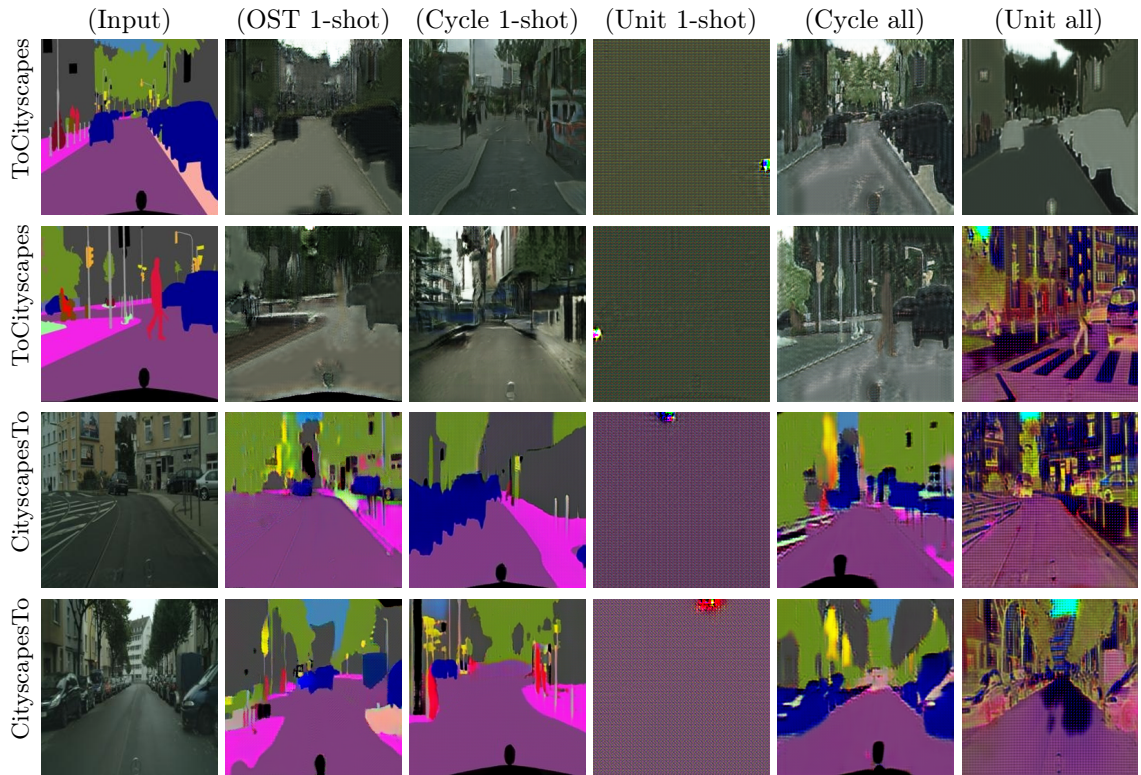

Figure 3: Additional mappings as given in Fig.3 of the paper for Cityscapes to Images and Images to Cityscapes.



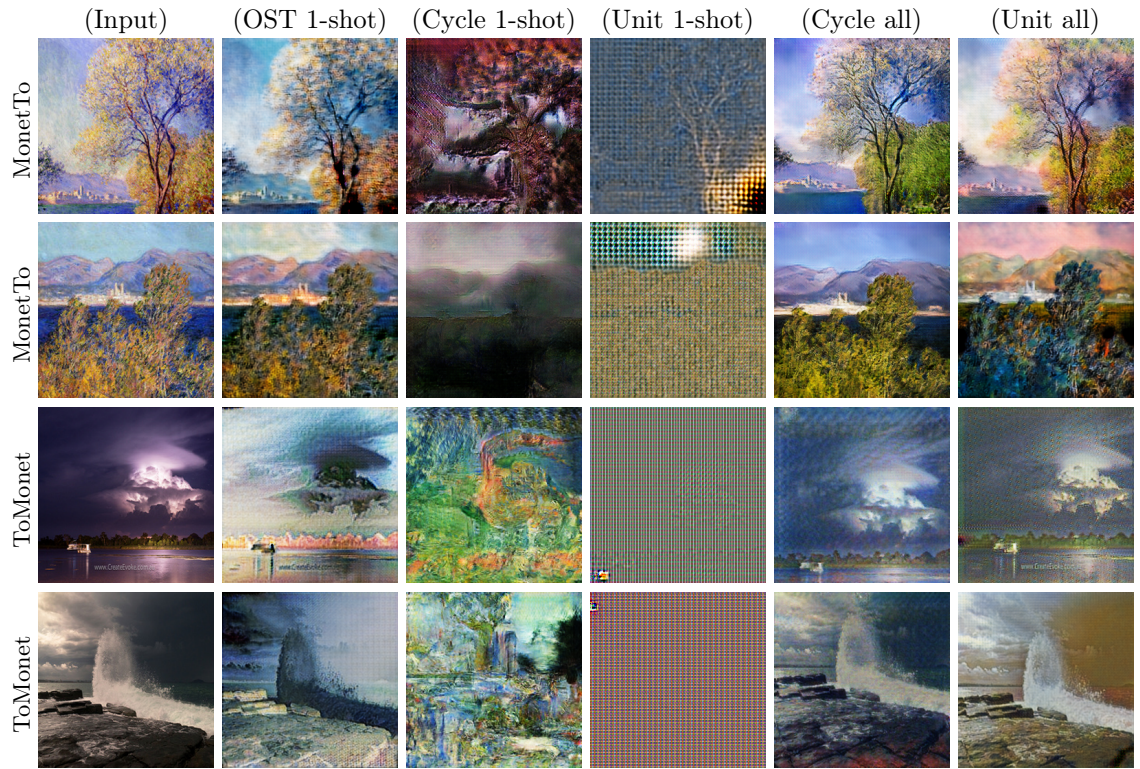

Figure 4: Additional mappings as given in Fig.3 of the paper for Monet to Photo and Photo to Monet.

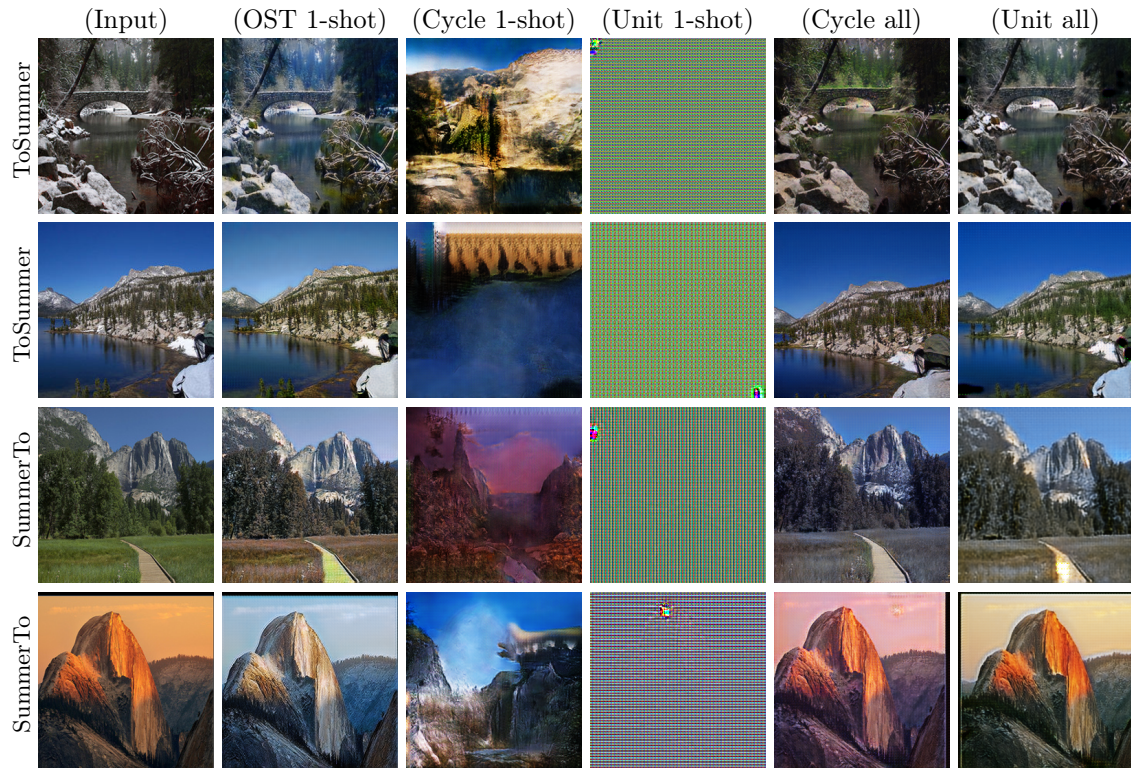

Figure 5: Additional mappings as given in Fig.3 of the paper for Summer to Winter and Winter to Summer.
